# Supplementary material
Source: PubMed Central journal article supplement (PMC4008836)
Supplement: mmc1.pdf [file mmc1.pdf]

# Role of a Helix B Lysine Residue in the Photoactive Site in Channelrhodopsins

Hai Li\*, Elena G. Govorunova\*, Oleg A. Sineshchekov, and John L. Spudich<sup>#</sup>

Center for Membrane Biology, Department of Biochemistry and Molecular Biology, University of Texas Medical School, Houston, Texas

\*Equal contributors

<sup>#</sup>Correspondence: john.l.spudich@uth.tmc.edu

## SUPPORTING FIGURES

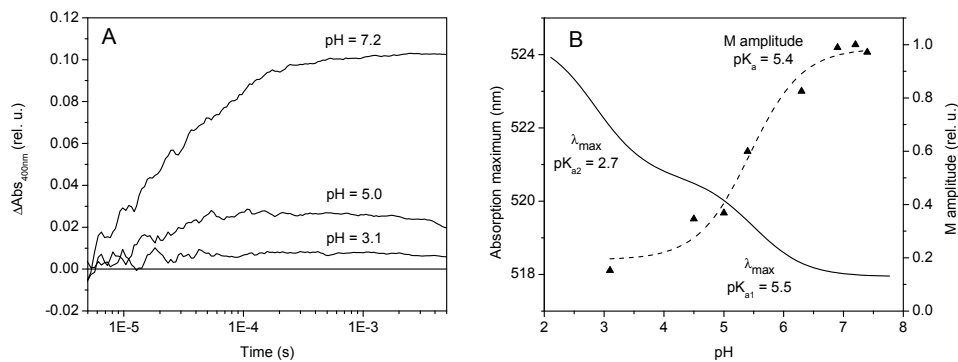

FIGURE S1 (A) Absorbance changes monitored at 400 nm in wild-type *CaChR1* in response to a 6-ns laser flash (532 nm) at different pH, as indicated in the figure. (B) Correlation of the first acidic spectral transition (left axis, squares and solid line, part of the data shown in Fig. 5) and the amplitude of the M absorption difference (right axis, triangles and dashed line) measured as shown in panel A. The  $\text{pK}_{\text{a}}$ s were calculated using the Henderson-Hasselbalch equation.

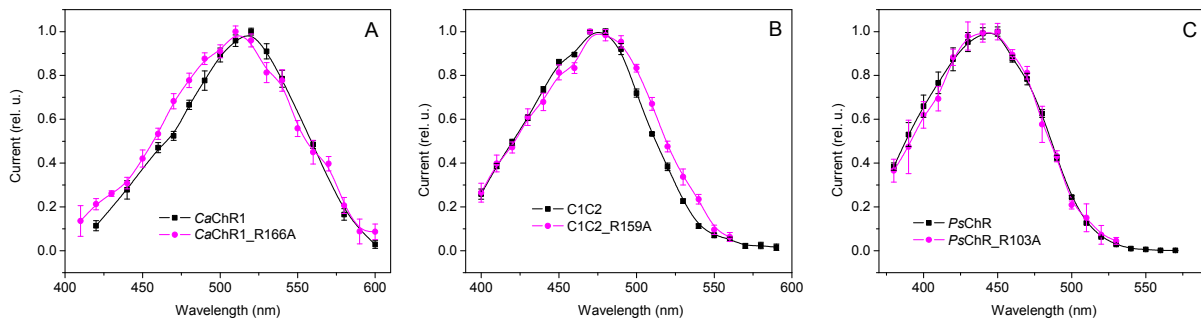

FIGURE S2 Action spectra of channel currents generated in HEK293 cells after alanine substitution for the Arg-82 homolog: (A) *CaChR1*; (B) *C1C2*; (C) *PsChR*. In all panels, black squares and lines show data for wild-type pigments, and magenta circles and lines for the mutants.

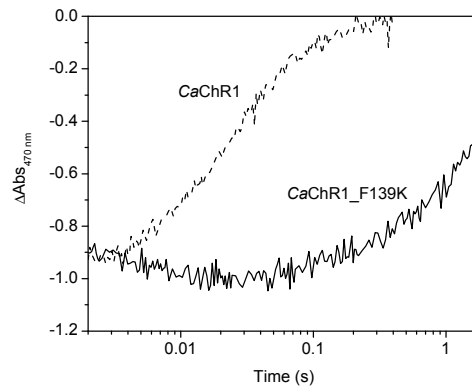

FIGURE S3 Recovery of the unphotolyzed state in wild-type CaChR1 and its F139K mutant monitored as absorbance changes at 470 nm in response to a 6-ns laser flash (532 nm).
